1                    **Metagenomic evidence for a polymicrobial signature of sepsis**

2

3 Cedric Chih Shen Tan<sup>1\*</sup>, Mislav Acman<sup>1</sup>, Lucy van Dorp<sup>1&</sup>, Francois Balloux<sup>1&</sup>

4 <sup>1</sup> UCL Genetics Institute, University College London, Gower Street, London, WC1E 6BT, United Kingdom

5 \* Corresponding Author

6 E-mail: cedricstan@gmail.com

7

8 & Co-last authors.

9

## 10 **Abstract**

11 Our understanding of the host component of sepsis has made significant progress. However, detailed  
12 study of the microorganisms causing sepsis, either as single pathogens or microbial assemblages, has  
13 received far less attention. Metagenomic data offer opportunities to characterise the microbial  
14 communities found in septic and healthy individuals. In this study we apply gradient-boosted tree  
15 classifiers and a novel computational decontamination technique built upon SHapley Additive  
16 exPlanations (SHAP) to identify microbial hallmarks which discriminate blood metagenomic samples of  
17 septic patients from that of healthy individuals. Classifiers had high performance when using the read  
18 assignments to microbial genera (AUROC = 0.995), including after removal of species ‘confirmed’ as  
19 the cause of sepsis through clinical testing (AUROC = 0.915). Models trained on single genera were  
20 inferior to those employing a polymicrobial model and we identified multiple co-occurring bacterial  
21 genera absent from healthy controls.

## 22 **Importance**

23 While prevailing diagnostic paradigms seek to identify single pathogens, our results point to the  
24 involvement of a polymicrobial community in sepsis. We demonstrate the importance of the microbial  
25 component in characterising sepsis, which may offer new biological insights into the aetiology of sepsis  
26 and allow the development of clinical diagnostic or even prognostic tools.

27

## 28 **Introduction**

29 Sepsis poses a significant challenge to public health and was listed as a global health priority by the  
30 World Health Organisation (WHO) in 2017. In the same year, 48.9 million cases of sepsis and 11  
31 million deaths were recorded worldwide [1] having a particular impact in low and lower-middle income  
32 countries [2].

33 Current research efforts have predominately focused on understanding the host's response to sepsis.  
34 Indeed, all contemporary definitions of sepsis focus on the host's response and resulting systemic  
35 complications. The 1991 Sepsis-1 definition described sepsis as a systemic inflammatory response  
36 syndrome (SIRS) caused by infection, with patients being diagnosed with sepsis if they fulfil at least two  
37 SIRS criteria and have a clinically confirmed infection [3]. The 2001 Sepsis-2 definition then expanded  
38 the scope of SIRS to include more symptoms [4]. More recently, the 2016 Sepsis-3 definition sought to  
39 differentiate between mild and severe cases of dysregulated host responses, describing sepsis as a life-  
40 threatening organ dysfunction as a result of infection [5]. Significant progress has been made in  
41 understanding how dysregulation occurs [6] and the long-term impacts of sepsis [7,8]. Additionally,  
42 early-warning tools have been developed based on patient health-care records [9–11] and clinical  
43 checklists [12,13]. However, the focus on the host component of sepsis may overlook the important role  
44 of microbial composition in the pathogenesis of the disease.

45 Due to the severity of sepsis, current practice considers identification of a single pathogen sufficient to  
46 warrant a diagnosis, without consideration of other, potentially relevant, species in the bloodstream.  
47 Upon diagnosis, infections are rapidly treated with broad spectrum antibiotics. However, blood cultures,  
48 the current recommended method of diagnosis before antimicrobial treatment [14], are known to yield  
49 false negatives due to certain microorganisms failing to grow in culture [15], particularly in samples

50 with low microbial loads [16]. Culture-based methods, while useful in a clinical context, may therefore  
51 under-estimate the true number of causative pathogens infecting septic patients.

52 Sepsis is a highly heterogeneous disease which consists of both a host component and a microbial  
53 component. While the former has been widely studied, the latter appears to represent a largely untapped  
54 source of information that could further advance our understanding of sepsis. Several diseases manifest  
55 as a result of interactions in a polymicrobial community. For example, microbial interactions in lung,  
56 urinary tract and wound infections are all known to contribute to differing disease outcomes (reviewed  
57 by Tay *et al.* [17]). These findings suggest that the microbial component of sepsis may also be crucial to  
58 understanding its pathogenesis.

59 Current technologies to investigate the presence of polymicrobial communities have some major  
60 limitations. As noted previously, culture-based methods have a high false negative rate. Further, without  
61 knowledge of the range of microorganisms that infect blood, co-culture experiments to study microbial  
62 interactions prove difficult. For polymerase chain reaction-based technologies, the use of species-  
63 specific primers (e.g. SeptiFast [18]) necessitates *a priori* knowledge of microbial sequences  
64 endogenous to septic blood. Lastly, metagenomic sequencing is ubiquitously prone to environmental  
65 contamination. This can include DNA from viable cells introduced during sample collection, sample  
66 processing, or DNA present in laboratory reagents [19–21]; the so called ‘kitome’. As such, it can be  
67 difficult to determine which microorganisms are truly endogenous to the sample, and at what abundance.

68 In this study, we sought to expand our understanding of the full microbial component of sepsis. Multiple  
69 statistical and state-of-the-art machine learning techniques were applied to metagenomic sequencing  
70 data published by Blauwkamp *et al.* [22] (henceforth Karius study) from 117 sepsis patients and 170  
71 healthy individuals. To circumvent the problem of potential contamination in metagenomic data, we  
72 developed and applied a novel computational contamination reduction technique. We also externally

73 validated our findings using external hold-out datasets comprising three other independent sepsis  
74 cohorts. Taken together, our results provide strong evidence for a polymicrobial signature of sepsis and  
75 the utility of metagenomic sequencing for the investigation of blood-borne infections.

## 76 Results

### 77 Metagenomic sequencing can be used to discriminate septic from healthy samples

78 We first assessed the suitability of taxonomic assignments for discriminating between septic and healthy  
79 blood metagenomic samples. Gradient-boosted tree classifiers were trained and evaluated using data  
80 matrices generated via *Kraken 2* taxonomic assignment, with samples represented in rows and taxa in  
81 columns (*i.e.* features). Each element in the matrices represented the total number of reads assigned to  
82 each taxon, which we loosely refer to as ‘abundance’. The set of taxa used in each analysis will  
83 henceforth be referred to as the ‘feature space’. Models were first trained and evaluated using 117 septic  
84 patients and 170 healthy individuals in the Karius study (Table 1). To determine if our findings were  
85 applicable beyond the Karius dataset, we pooled the Karius dataset with metagenomic information from  
86 three other independent sepsis cohorts [23–25]. The final pooled dataset contains sequence data from  
87 multiple sources, sepsis definitions and sequencing techniques (Table 1). We will henceforth refer to  
88 individual datasets by their dataset alias as shown in Table 1.

89 **Table 1. Summary of metagenomic datasets.** Sample sizes indicated here are those after all quality control steps  
90 have been applied.

| Study                          | Dataset alias | Accession                | Sepsis definition | Sequencing technique | Sample size |         |
|--------------------------------|---------------|--------------------------|-------------------|----------------------|-------------|---------|
|                                |               |                          |                   |                      | Septic      | Healthy |
| Grumaz <i>et al.</i> (2019)    | Grumaz-19     | PRJEB21872<br>PRJEB30958 | Sepsis-2          | Shotgun              | 50          | -       |
| Grumaz <i>et al.</i> (2016)    | Grumaz-16     | PRJEB13247               | Sepsis-2          | Shotgun              | 7           | 15      |
| Gosiewski <i>et al.</i> (2017) | Gosiewski-17  | Requested from authors   | Sepsis-1          | 16S (paired-end)     | 56          | 23      |
| Blauwkamp <i>et al.</i> (2019) | Karius        | PRJNA507824              | Sepsis-1          | Shotgun              | 117         | 170     |

91

92 The performance of all classifiers is summarised in Table 2. Using the raw feature space, parsed from  
93 the *Kraken 2* taxonomic assignments, classifiers had a very high classification performance (*Karius-*  
94 *Neat* model; AUROC = 0.995) in discriminating sepsis from healthy samples based on microbial content  
95 alone. This was similarly observed when using the pooled dataset (*Pooled-Neat* model; AUROC =  
96 0.982).

97 **Table 2. Summary of models trained.** The prefix and suffix of each model name corresponds to the dataset and  
98 contamination reduction technique applied, respectively. *Neat*, *SD*, and *CR* refer to the feature spaces with no,  
99 Simple Decontamination, and SHAP Decontamination applied, respectively (see Methods). *Karius-Without*  
100 corresponds to the SHAP decontaminated feature space after claimed ‘confirmed’ pathogens are excluded.  
101 *Karius-Only* refers to the feature space containing only genera with ‘confirmed’ pathogens as features.

| No. of Features | Feature Space         | Model Performance |        |       |
|-----------------|-----------------------|-------------------|--------|-------|
|                 |                       | Precision         | Recall | AUROC |
| 1564            | <i>Karius-Neat</i>    | 0.976             | 0.983  | 0.995 |
| 111             | <i>Karius-SD</i>      | 0.896             | 0.787  | 0.942 |
| 25              | <i>Karius-CR</i>      | 0.883             | 0.810  | 0.942 |
| 22              | <i>Karius-Without</i> | 0.803             | 0.727  | 0.915 |
| 22              | <i>Karius-Only</i>    | 0.929             | 0.862  | 0.950 |
| 685             | <i>Pooled-Neat</i>    | 0.950             | 0.939  | 0.982 |
| 21              | <i>Pooled-CR</i>      | 0.870             | 0.796  | 0.904 |

102

### 103 **SHAP can be used to remove putative sequencing contaminants**

104 Accurate characterisation of the microbial component of sepsis requires discrimination between a true  
105 biological signal and that arising from putative environmental contamination in metagenomes. We  
106 developed and applied a procedure to remove biologically irrelevant genera from the feature space,  
107 which we will refer to as SHAP Decontamination (CR; see Methods). Briefly, we leveraged SHapley  
108 Additive exPlanations (SHAP) – a state-of-the-art machine learning technique for interpreting ‘black-  
109 box’ classifiers [26] – to determine how the read counts assigned to a genus (*i.e.* feature) influences  
110 model predictions. In doing so, we selectively removed putative contaminants from the feature spaces  
111 obtained from taxonomic classification.

112 To evaluate the effectiveness of this approach, we compared SHAP Decontamination to a simpler  
113 statistical method for the removal of putative pathogens, which we call Simple Decontamination (SD;  
114 see Methods). For the Karius dataset, application of SHAP Decontamination resulted in a pruned feature  
115 space of 25 genera while Simple Decontamination resulted in 111 genera. The resultant *Karius-CR* and  
116 *Karius-SD* feature spaces, respectively, shared 21 genera in common. Classifiers trained on either of the  
117 *Karius-CR* or *Karius-SD* feature space had similarly high performance (Table 2, *Karius-CR/SD*;  
118 AUROC = 0.942), despite the large reduction in the number of features. This suggests that  
119 computational decontamination efficiently removes redundancy in the metagenomic feature space.  
120 Furthermore, SHAP Decontamination appears to be more efficient as demonstrated by the equivalent  
121 classification performance, but higher number of removed putative contaminant genera than Simple  
122 Decontamination.

123 Separately, we observed that the *Karius-CR* model comprised almost all genera associated to sepsis at  
124 higher abundance. Additionally, genera such as *Sphingobium*, *Mesorhizobium* and *Ralstonia*, were  
125 highly important features in the *Karius-Neat* feature space (Fig. 1a), though not present in either the



126 *Karius-SD* or *Karius-CR* feature space (Fig. 1b and c). These genera are likely to be contaminants since  
127 they contribute negatively to the predicted probability of sepsis at high abundance, and have been  
128 previously ascribed as common sequencing contaminants [19]. Of the 25 genera in the *Karius-CR*  
129 feature space, eight corresponded to genera containing clinically ‘confirmed’ pathogens (see Methods).  
130 Notably, *Escherichia* and *Enterobacter*, which are both ‘confirmed’ pathogens but also common  
131 contaminants [19], were retained in both decontaminated feature spaces. These findings collectively  
132 suggest that computational decontamination procedures were removing putative contaminants while  
133 selectively retaining biologically important genera.

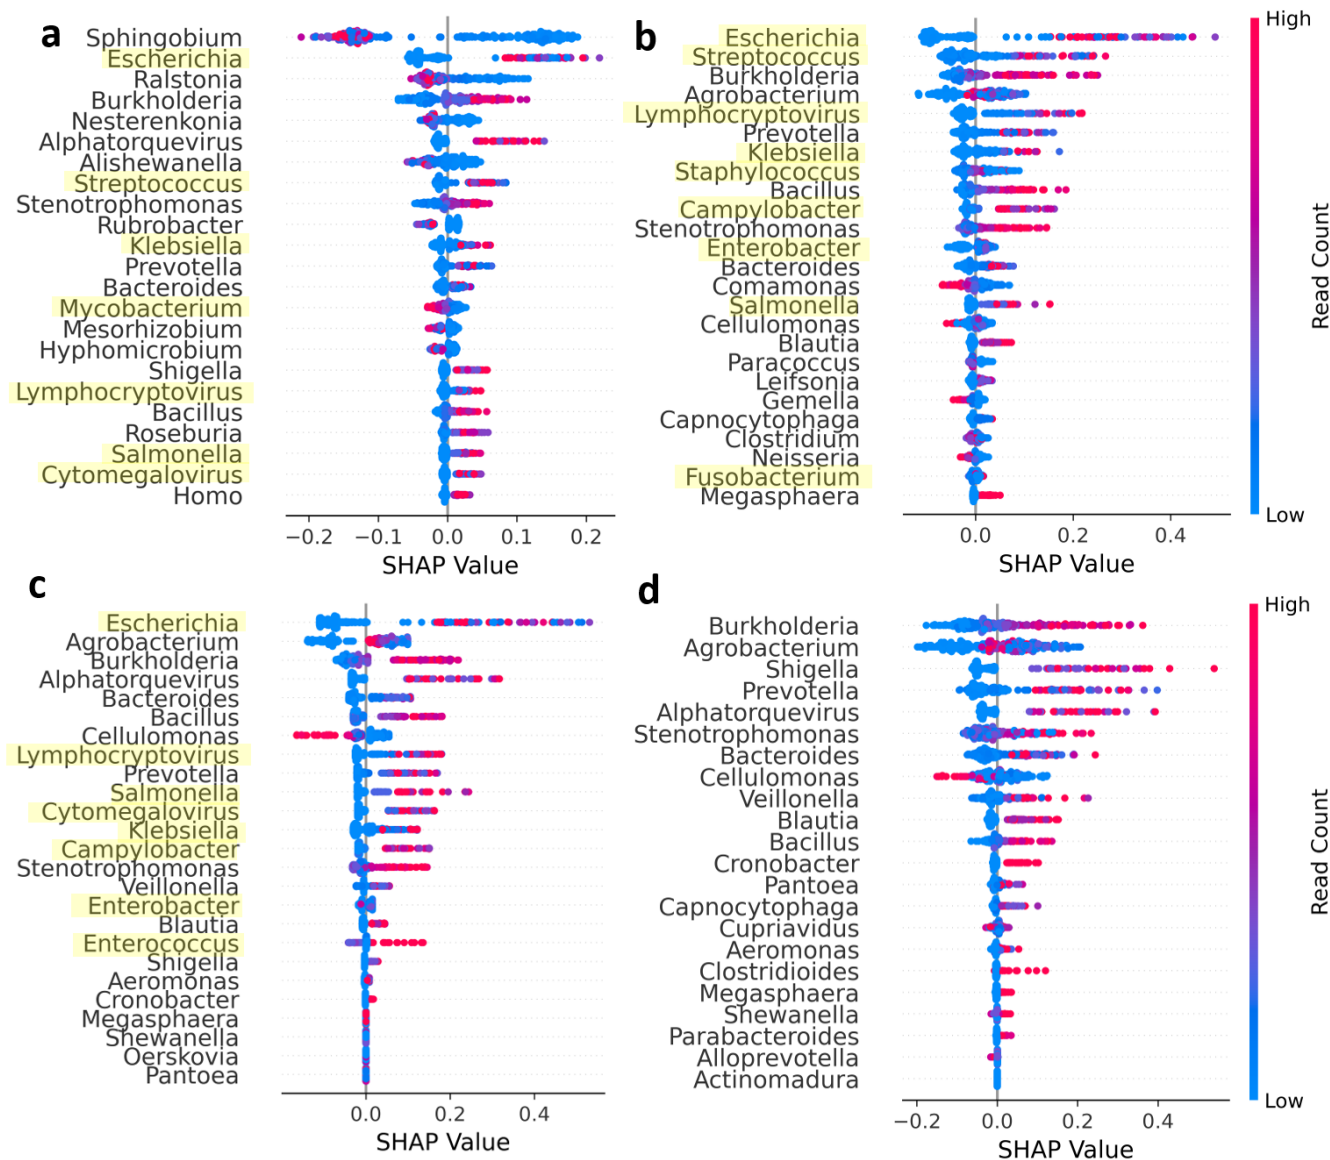

134

135

136

137

138

139

140

141

**Figure 1. Model interpretation and performance.** (a) Plot summarising the SHAP values across all samples for the most important features ranked by the mean absolute SHAP value (highest at the top) for *Karius-Neat*, (b) *Karius-SD*, (c) *Karius-CR* and (d) *Karius-Without* models. Each point represents a single sample. Points with similar SHAP values were stacked vertically for visualisation of point density and were coloured according to the magnitude of the feature values (*i.e.* read counts). Genera that contained ‘confirmed’ pathogens are highlighted in yellow.

## 142 **Evidence for a polymicrobial community**

143 Having assessed the biological relevance of microbial predictors of sepsis, we provide several pieces of  
144 evidence supporting a polymicrobial model of sepsis; that is, that there are sets of microbial genera that  
145 delineate septic from healthy blood metagenomes, rather than just individual pathogens. Most notably, a  
146 classifier trained on the Karius dataset using the SHAP decontaminated feature space but with all genera  
147 containing clinically identified pathogens (henceforth ‘confirmed’ pathogens; see Methods) removed  
148 performed well (*Karius-Without* model; AUROC = 0.915) suggesting the presence of these species  
149 alone does not capture the full microbial signal of sepsis. Visualisation of the SHAP values for this  
150 model (Fig. 1d) confirmed that most genera had positive associations with sepsis at higher abundances.  
151 To test if any single features in the *Karius-Without* model were driving the high classification  
152 performance, we trained and evaluated multiple single-feature classifiers with each genus in the *Karius-*  
153 *Without* feature space. Additionally, we trained a classifier on genera containing ‘confirmed’ pathogens  
154 as features only (*Karius-Only*). Fig. 2 shows the performance of the multi-feature *Karius-Neat*, *Karius-*  
155 *Without* and *Karius-Only* models compared to single-feature models. All multi-feature models  
156 performed superior to those relying on single-feature models.

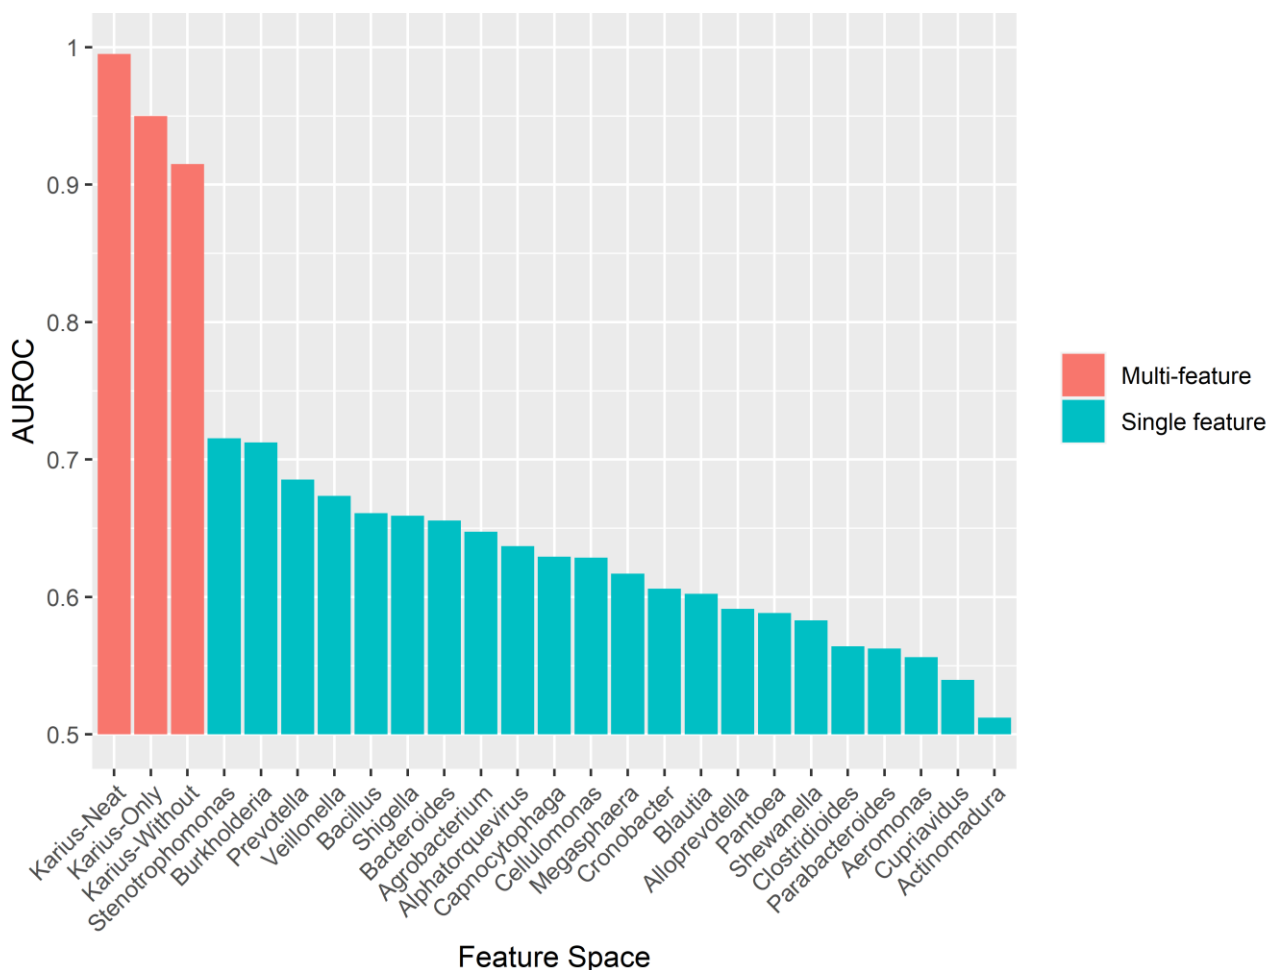

157

158 **Figure 2.** Comparison of performance (AUROC) for the multi-feature models (*Karius-Neat*, *Karius-Only*,  
159 *Karius-Without* feature space) and single-feature models (x-axis).

160 We then trained classifiers on the pooled dataset to determine if our results were unique to the Karius  
161 dataset or whether they were portable to other sepsis cohorts. Current metagenomics datasets are limited  
162 in their suitability for external validation due to the use of different sequencing technologies, differing  
163 sepsis definitions and small sample sizes. However, despite the pooled dataset comprising multiple data  
164 sources from different studies, the classifier still performed well (*Pooled-Neat* model, AUROC = 0.982;  
165 *Pooled-CR* model, AUROC = 0.904). This strongly suggests that there is a generalisable microbial  
166 signature which can be leveraged across metagenomic datasets.

167 To more formally test the generalisability of the observed polymicrobial signature, we trained classifiers  
168 on pooled data from two data sources while holding out data from the last source for testing (Fig. 3).  
169 Most notably, the classifier trained on shotgun metagenomic data and tested on 16S data as the holdout  
170 set (Gosiewski-17) did not perform well. However, after SHAP Decontamination, classification  
171 performance improved markedly. Interestingly, this performance increase was not observed when using  
172 the other datasets as holdout sets (Fig. 3). Indeed, the classifier trained on the feature space before SHAP  
173 Decontamination with the Sepsis-2, Grumaz-16 and Grumaz-19 datasets as holdout performed well,  
174 whereas that trained with the feature space after decontamination performed relatively worse.  
175 Additionally, holding out the Karius dataset resulted in poor classification performance both before and  
176 after SHAP Decontamination. A possible explanation for SHAP Decontamination lowering  
177 classification performance when Grumaz-16/19 is used as the test set is that septic cases recruited in  
178 these studies were based on different sepsis definitions which may involve a different set of pathogens  
179 and reflect different aetiologies. Separately, the poor performance observed when the Karius dataset is  
180 used as the test set can be attributed to the highly imbalanced training dataset (Fig. 3).

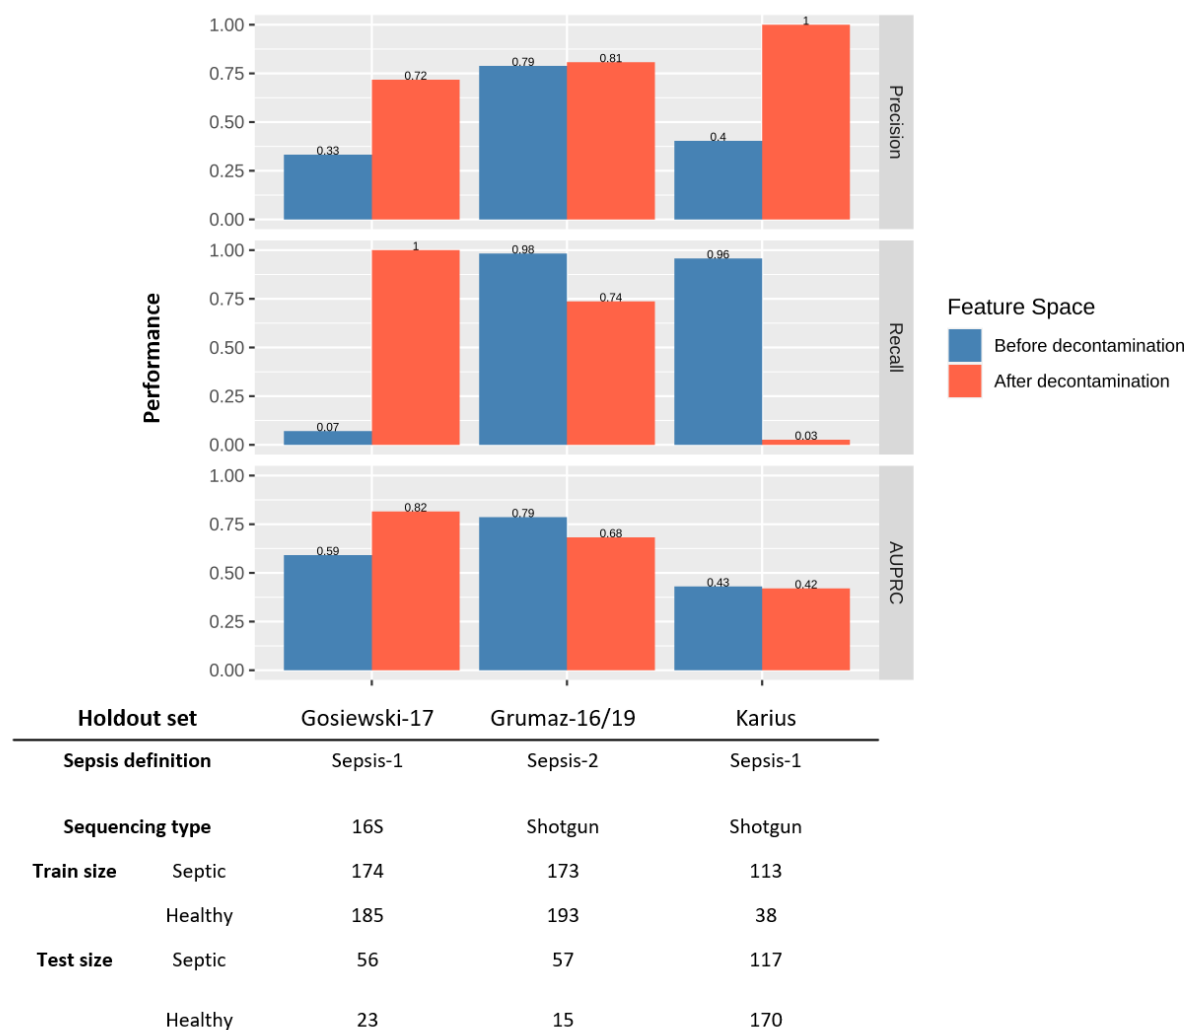

181  
182 **Figure 3.** Performance of optimised classifiers tested on different holdout datasets before and after SHAP  
183 Decontamination. Grumaz-16 and Grumaz-19 were pooled to form a single test set.

184 Lastly, microbial co-occurrence networks were used to identify relationships between genera that were  
185 exclusive to samples from septic patients. Two genera are said to co-occur if an increase in the  
186 abundance of one is associated with an increase in the abundance of the other. The presence of such  
187 relationships would lend weight to the polymicrobial nature of sepsis infections. The *Karius-SD* feature  
188 space was used in this analysis to corroborate previous analyses using the *Karius-CR* feature space.  
189 Multiple co-occurrence relationships between genera were present in the corrected network including  
190 those containing 10 of the 22 ‘confirmed’ pathogens and 14 of the 25 genera in the *Karius-CR* feature

191 space (Fig. 4). Interestingly, we detected a group of co-occurring genera associated to the oral cavity  
192 (Fig. 4), as suggested by the Human Oral Microbiome Database [27] (accessed 15<sup>th</sup> July 2020) and the  
193 current literature [28–31]. This was also present in the corrected network when the *Pooled-SD* feature  
194 space was used as input (Fig. S1).

195

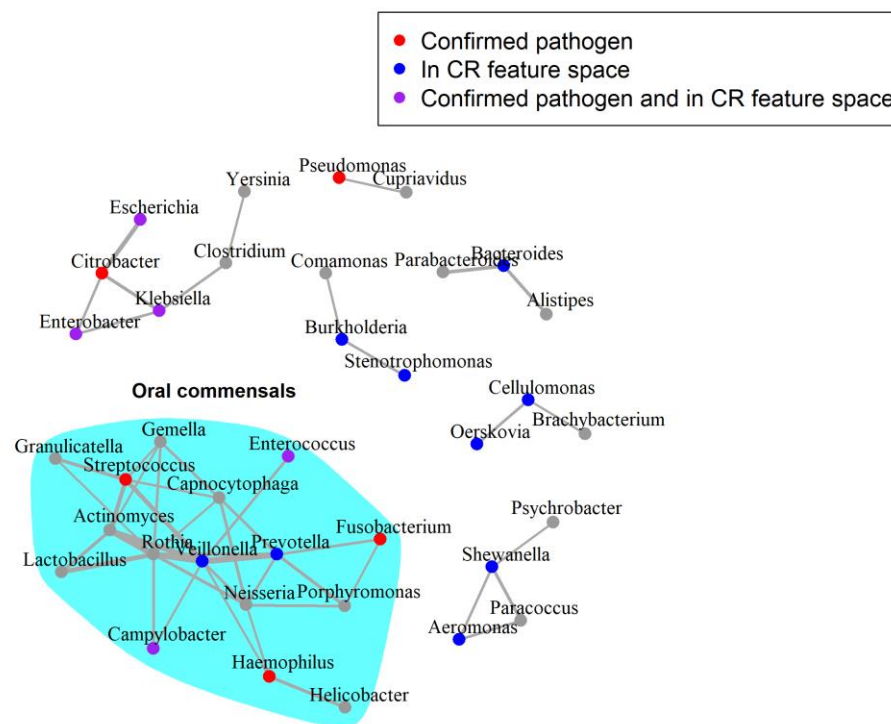

196

197 **Figure 4. Corrected microbial co-occurrence network for genera assigned in sepsis metagenomes.** Input data  
198 corresponds to the *Karius-SD* feature space. The edges in this network represent those in the septic network that  
199 were not present in the healthy network. The widths of edges are weighted by the strength of the *SparCC*  
200 correlations. Nodes are coloured as per the legend at top, with ‘confirmed’ pathogens those experimentally shown  
201 to be implicated in sepsis. The layout of the graph was generated using the Fruchterman-Reingold algorithm.

## 202 **Discussion**

### 203 **The polymicrobial signature of sepsis**

204 Our work demonstrates a clear polymicrobial signal in sepsis, where multiple, co-occurring, genera can  
205 be used to discriminate blood metagenomes of septic patients from that of healthy controls. The high  
206 performance of the *Karius-Without* model primarily highlights that genera containing ‘confirmed’  
207 pathogens were very useful in delineating septic from healthy samples. More importantly, the *Karius-*  
208 *Without* model, which had these genera removed (*Karius-Without*) also performed well, suggesting that  
209 the abundance of microbial genera that were not amongst the ‘confirmed’ pathogens are also highly  
210 relevant to delineating septic from healthy samples. Furthermore, the single-feature models performed  
211 poorly, highlighting that no genus is solely responsible for the high classification performance of the  
212 *Karius-Without* model, further supporting the polymicrobial nature of sepsis infections.

213 We also show that the polymicrobial signal we detected is generalisable across datasets, first by nested  
214 cross-validation with all datasets pooled (*Pooled-CR* model) and then with holdout cross-validation  
215 using the Gosiewski-17 or Grumaz-16/19 datasets as test sets. The increased performance after SHAP  
216 Decontamination when holding out 16S data (Gosiewski-17) suggests that the retained set of genera  
217 allow a markedly more generalisable decision boundary to be learnt, even across sequencing techniques.

218 Additionally, the multiple co-occurrence relationships between genera detected suggest that there may  
219 be a distinct microbial community that tends to be present during sepsis infection. Although our  
220 networks were inferred computationally, published evidence supports possible synergies between some  
221 of the co-occurring genera we detected. For example, using fluorescence in-situ hybridisation,  
222 interspecies spatial associations were found between *Prevotella*, *Veillonella*, *Streptococcus*, *Gemella*,  
223 *Rothia* and *Actinomyces* [32], which were also the genera with the strongest correlations in the corrected  
224 sepsis network (Fig. 3). Separately, *Stenotrophomonas* and *Burkholderia* are known to play a collective



225 role in the pathogenesis of cystic fibrosis [33]. Lastly, *Klebsiella pneumoniae* was found to be able to  
226 transmit extended spectrum beta-lactamase genes to *Citrobacter freundii* and *E. coli* [34], potentiating  
227 synergism during polymicrobial infections. These examples suggest that the co-occurrence relationships  
228 we computationally detected may reflect genuine biological relationships. Further investigation of the  
229 interactions between different clusters of genera in the corrected sepsis network, together with  
230 expanding to future datasets, may yield valuable insights into the underlying biology of sepsis infections  
231 and ultimately inform treatment.

232 The presence of a densely connected cluster of oral colonisers may point to a potential reservoir of  
233 sepsis pathogens. This also suggests the possibility of opportunistic infections from the human  
234 microbiota and dysbioses that could affect disease severity. This hypothesis is in line with the reported  
235 changes in nasal microbiomes in septic individuals [35] and the associations of intestinal dysbiosis with  
236 increased susceptibility to sepsis [36]. If these hypotheses were true, microbiome profiles of patients  
237 might offer opportunities to assess a patient's risk of developing sepsis prior to onset.

### 238 **The need to account for environmental contamination**

239 Contamination from environmental sources poses one of the greatest challenges for metagenomic  
240 investigations of microbial communities, particularly in low biomass and clinical samples [20,37]. It is  
241 therefore crucial to discriminate between contaminants and biologically relevant taxa and to remove  
242 putative contaminants to protect against spurious signals.

243 The main premise behind SHAP Decontamination is that pathogens should occur at higher abundance in  
244 septic patients relative to healthy controls. This is because we expect most infections to be characterised  
245 by the proliferation of microorganisms [38,39] and, as such, true pathogenic genera should contribute to  
246 a higher predicted probability of sepsis at higher abundances. Consequently, the abundance of  
247 contaminant taxa would demonstrate a negative Spearman's correlation with their corresponding SHAP

248 values. This allows putative contaminant genera to be computationally detected and removed. Our  
249 results demonstrate the efficacy of our post-hoc contamination reduction technique called SHAP  
250 Decontamination in removing redundancy in the feature space while selectively retaining taxa involved  
251 in sepsis. It is likely that the taxa removed in this procedure would in principle include commensals and  
252 environmental contaminants introduced during sample collection or preparation. As such, application of  
253 this technique provides greater confidence that the polymicrobial signals we observed were not largely  
254 driven by contaminants.

255 We appreciate that a more rigorous evaluation of this technique, particularly with mock communities,  
256 will be required. As an alternative to our contamination reduction technique, statistical decontamination  
257 techniques identifying inverse relationships between the assigned abundance of taxa and sample DNA  
258 concentration [40,41] could be used. However, this method was not applicable for our study since the  
259 sample DNA concentrations in the datasets used were not reported.

### 260 **Potential for metagenomics-based diagnostics**

261 Although we do not claim to have developed a model sufficiently robust for immediate diagnostic  
262 purposes, our results highlight the clear promise of metagenomics-informed diagnostic models, which  
263 have also been suggested by previous studies [22,42,43]. To put the high performance of our models in  
264 context, Mao et al. [9] reported that InSight, a model trained on vital signs of patients, had a diagnostic  
265 AUROC of 0.92 using Sepsis-2 as the ground truth. They also reported that the Modified Early Warning  
266 Score (MEWS), Sequential Organ Failure Assessment (SOFA) and SIRS had an AUROC of 0.76, 0.63  
267 and 0.75 respectively. Additionally, a classifier trained on nasal metagenomes of septic and healthy  
268 samples had an AUROC of 0.89 with Sepsis-3 as the ground truth [35]. Notably, it is difficult to  
269 compare the performance of models trained with labels generated by different definitions of sepsis,  
270 which is also inherently a highly heterogeneous disease. Further, the discrepancies in model

271 performance could be due to differences in the size of training and testing datasets. At the very least, our  
272 results suggest that the microbial component of sepsis alone contains sufficient information for the  
273 diagnosis of sepsis. A crucial next step will be to generate larger datasets, from more diverse sources, to  
274 allow the training of more robust and generalisable models for diagnostic or prognostic use.

## 275 **Limitations**

276 We identified several limitations in our study. Firstly, metagenomic sequencing involves measurements  
277 of circulating free DNA and not of viable microorganisms in blood. As such, the detection of DNA from  
278 multiple taxa does not necessarily represent the true number or abundance of active taxa present.  
279 However, multiple studies have demonstrated high concordance of targeted [44] or shotgun  
280 metagenomic sequencing with culture [22,42,45]. This suggests some level of agreement between the  
281 presence of microbial cells and their DNA in blood. Additionally, given its higher sensitivity and  
282 throughput, metagenomic sequencing appears to be the best tool currently available for gaining insights  
283 into polymicrobial infections.

284 Though our results suggest the importance of multiple genera in delineating metagenomes of septic  
285 patients from that of healthy controls, the etiological contributions of these genera and their ecological  
286 relationships cannot be inferred. Such hypotheses must be confirmed experimentally. It is also important  
287 to keep in mind that the models presented in this study are not prognostic in nature, in that they were not  
288 trained to predict the onset or progression of sepsis. However, furthering our understanding of the  
289 microbial component of sepsis may prove useful in the development of better prognostic tools.

290 Some genera such as *Escherichia* and *Enterobacter* contain both biologically relevant genera and  
291 common sequencing contaminants. As such it is expected that a proportion of DNA molecules, and  
292 hence sequencing reads, may have come from contamination rather than microorganisms endogenous to

293 blood. The abundance of these microorganisms, as detected by metagenomic approaches, may differ  
294 from the true abundance.

295 Additionally, *k*-mer based approaches may be less accurate for taxonomic classification compared to, for  
296 example, Bayesian sequence read-assignment methods [46]. As such, we used taxonomic assignments at  
297 the genus level which were shown to be, in general, more reliable than that at the species level [47]. We  
298 also appreciate that *k*-mer based classification approaches are significantly faster [48], which may  
299 provide clinically relevant turnaround times that are important in sepsis diagnostics.

300 Finally, we acknowledge the relatively small size of the datasets used in our analyses. As a result, the  
301 models presented in this study are not yet robust enough to be used in a clinical context. A larger and  
302 more diverse dataset is required to develop such models. This is to ensure that models can learn a more  
303 generalisable decision boundary for accurate sepsis diagnosis.

304 Irrespective of these limitations, our results nonetheless demonstrate the importance of considering the  
305 full polymicrobial component of sepsis and suggest that a metagenomics-based approach may provide  
306 biological and clinical insights supporting the future development of rapid diagnostic tools.

307 The advent of large-scale metagenomic sequencing of clinical samples offers new opportunities to better  
308 characterise the pathogens contributing to systemic infections, and unlike culture-based methods are not  
309 limited to organisms that are fast-growing or culturable. In this study, we demonstrate the promise of a  
310 metagenomics-based approach to sepsis. Our results provide evidence that septic infections should be  
311 considered as polymicrobial in nature, comprising multiple co-occurring pathogens indicative of disease.  
312 Our findings thus pave the way for more microbial-focused models of sepsis, with long run potential to  
313 inform early detection, clinical interventions and improve patient outcomes.

## 314 **Materials and Methods**

### 315 **Datasets**

316 Our primary analysis involved published shotgun metagenomic sequence data from the Karius study  
317 [22]. As detailed in this study, patients were diagnosed with sepsis if they presented with a temperature  
318  $> 38^{\circ}\text{C}$  or  $< 36^{\circ}\text{C}$ , at least one other Systemic Inflammatory Response Syndrome (SIRS) criterion, and  
319 evidence of bacteraemia. Bacteraemia was confirmed via clinical microbiological testing performed  
320 within seven days after collection of the blood samples. The list of pathogens identified by such tests  
321 (which we refer to as ‘confirmed’ pathogens) can be found in Supplementary Table 5 of the Karius  
322 study, under the ‘definite’ adjudication. This included tissue, fluid and blood cultures, serology and  
323 nucleic acid testing. The clinical outcome of each patient was not reported in the original study. Seven of  
324 the 117 septic patients were found to have more than one ‘confirmed’ pathogen identified by  
325 microbiological testing (Supplementary Table 5; Karius study). According to the Karius study, healthy  
326 individuals were “screened for common health conditions including infectious diseases through a  
327 questionnaire and standard blood donor screening assays”. We believe this to be reasonable grounds for  
328 ruling out bloodstream infections in healthy patients (i.e. of non-septic origin).

### 329 **Data pre-processing**

330 As described in the Karius study, input circulating free DNA was sequenced using NextSeq500 (75-  
331 cycle PCR, 1 x 75 nucleotides). Raw Illumina sequencing reads were demultiplexed by bcl2fastq  
332 (v2.17.1.14; default parameters) and quality trimmed using Trimmomatic (v0.32) [49] retaining reads  
333 with a quality (Q-score) above 20. Mapping and alignment were performed using Bowtie (v2.2.4) [50].  
334 Human reads were identified by mapping to the human reference genome and removed prior to  
335 deposition in NCBI’s Sequence Read Archive (PRJNA507824).

336 For Grumaz-16 and Grumaz-19, *BBMap* (v38.79) [51] was used to trim adapter sequences, remove reads  
337 with a Q-score below 20 and remove reads mapping to the masked human hg19 reference  
338 (<https://tinyurl.com/yya4xmrg>). For the Gosiewski-17 dataset, we performed the same pre-processing  
339 steps as reported in the associated study [24]. Briefly, primers and adapters were removed using  
340 *Cutadapt* (v1.18) [52], paired reads merged using *ea-utils* (v1.1.2.537) [53], merged reads and forward  
341 unmerged *fastq* files concatenated, and reads with a Q-score below 20 removed using *BBMap*.

342 Taxonomic classification of all shotgun sequencing data was performed using *Kraken 2* (v2.0.9-beta;  
343 default parameters) [54] with the *maxikraken2\_1903\_140GB* database (<https://tinyurl.com/y7zfg9kr>).  
344 For the Gosiewski-17 dataset, *Kraken 2* with a *Kraken 2*-built *Silva* database was used instead of  
345 conventional 16S amplicon metagenomic classification methods [55]. Read assignments for all  
346 ‘confirmed’ bacterial pathogens using the *maxikraken2\_1903\_140GB* and *Kraken 2*-built *Silva*  
347 databases are shown in Fig. S2. While the relative number of reads assigned to each bacterial genus  
348 showed some inconsistencies, this hardly affected the classifier performance of septic and healthy  
349 patients (Fig. S3). This suggests that our model is fairly robust to heterogeneity which may be  
350 introduced by the classification step. For downstream analyses, we use the genera assignments based on  
351 the *Kraken 2*-built *Silva* database for the 16S Gosiewski-17 samples. Additionally, all unclassified reads  
352 were excluded from the analyses. The feature space obtained directly from *Kraken 2* taxonomic  
353 assignment is denoted by *Neat*.

354 Unexpectedly, for the Karius dataset, some reads were assigned to the genus *Homo* which was possibly  
355 due to misclassification. Mapping of all reads in the Karius sequencing data found just 873 bases with  
356 96% identity to the masked human reference. Since human reads were already removed in the  
357 bioinformatic workflow of the Karius study, we did not perform an additional human read removal step  
358 to avoid introducing biases into the data.

## 359 **Model training, optimisation and evaluation**

360 Classifiers were trained with a binary-logistic loss function and implemented using *XGBoost* API  
361 (v0.90) [56]. Model optimisation was performed using a randomised hyperparameter optimisation  
362 protocol [57] (1000 samples) implemented using *RandomizedSearchCV* in the *Scikit-learn* API (v0.23.1)  
363 [58]. The test error of each model was estimated using a nested, stratified, 10 x 10-fold cross-validation  
364 procedure. The best performing sets of hyperparameters that maximise the receiver operating  
365 characteristic curve (AUROC) of each model were determined and used for downstream analyses. The  
366 test error of each model was also estimated using a holdout test set after hyperparameter optimisation.  
367 For this procedure, precision, recall and AUPRC were used as performance metrics since they are more  
368 informative when used on imbalanced test sets [59].

## 369 **Model interpretation**

370 To interpret models, each feature in a single sample was assigned a SHAP value, which corresponds to  
371 the change in a sample's predicted probability score (*i.e.* probability of sepsis) when the feature is either  
372 present or absent. Using SHAP values therefore allows the decomposition of predicted probability  
373 scores for each sample into the sum of contributions from individual genera. The relative importance of  
374 each feature was inferred via its mean absolute SHAP value across all samples. A higher mean absolute  
375 SHAP value implies that the feature has a larger impact on the model predictions. SHAP values were  
376 computed using *TreeExplainer*, part of the *shap* library (v0.34.0) [26]. For every model, SHAP values  
377 were computed for the whole dataset by setting the *feature\_perturbation* parameter to 'interventional'.

## 378 **SHAP Decontamination**

379 SHAP Decontamination was performed in two main steps. Firstly, genera that are not currently  
380 identified as known human pathogens were first removed. This selection was based on a study by Shaw  
381 *et al.* [60], who considered as a 'human pathogen' any microbial species for which there is evidence in

382 the literature that it can cause infection in humans, sometimes in a single patient. Secondly, a classifier  
383 was optimised and trained on genera abundance (*Neat* feature spaces). SHAP values for model  
384 predictions on the dataset were then calculated. Genera with a negative Spearman's correlation between  
385 their corresponding SHAP values and abundances were removed. Spearman's correlations were  
386 calculated using *spearmanr* as part of the *SciPy* library (v1.4.1) [61]. A new classifier was then retrained  
387 using the previously optimised set of parameters but with this new reduced feature space. This process  
388 was repeated iteratively until the number of genera retained remained constant. The resultant feature  
389 space is denoted by *CR*.

390 To test the hypothesis that genera containing true pathogens are positively associated with sepsis, we  
391 inspected the SHAP values and read counts assigned to the genera corresponding to cases of each type  
392 of 'confirmed' infection (*e.g.* SHAP value/read count assigned to *Escherichia* for only *Escherichia*-  
393 positive samples) using the *Karius-Neat* feature space. The SHAP values were all at greater or equal to  
394 zero apart from a single sample which had a negative SHAP value for *Mycobacterium* (Fig. S4). The  
395 assigned read counts were non-zero except for one sample with a 'confirmed' fungal *Candida glabrata*  
396 infection reported (SRR8288759). These findings suggest that SHAP values can be used to identify  
397 experimentally identified pathogens.

### 398 **Simple Decontamination**

399 We also employed a more direct, model-free contaminant removal technique (Simple Decontamination)  
400 that follows the same underlying premise of SHAP Decontamination. In this procedure, genera in the  
401 *Neat* feature space that were significantly ( $p < 0.05$ ) more abundant in healthy controls than septic  
402 samples were considered contaminants and removed. The resultant feature space is denoted by *SD*.



## 403 **Microbial networks**

404 Microbial co-occurrence networks were constructed using the *SparCC* algorithm [62], implemented in  
405 the *SpiecEasi* package (v1.1.0) [63] and visualised using *Igraph* (v1.2.5) [64]. *SparCC* was used to  
406 account for compositionality that could lead to spurious correlations. Separate networks were  
407 constructed for the genera assignments of septic and healthy metagenomes. To determine the microbial  
408 associations present exclusive to septic samples, a corrected sepsis network was produced. This network  
409 was constructed by subtracting all edges of the healthy network from the sepsis network. Only co-  
410 occurrence relationships where the *SparCC* correlations exceed 0.2 were retained. The *Karius-SD*  
411 feature space was used as input.

## 412 **Data Availability**

413 All relevant source code and parsed datasets can be found on GitHub  
414 (<https://github.com/cednotsed/Polymicrobial-Signature-of-Sepsis>). The raw sequence data for each study  
415 can be found from NCBI SRA and the European Nucleotide Archive (ENA) repository with the  
416 accessions listed in Table 1.

## 417 **References**

418

- 419 [1] Rudd KE, Johnson SC, Agesa KM, Shackelford KA, Tsoi D, Kievlan DR et al. (2020) Global, regional,  
420 and national sepsis incidence and mortality, 1990–2017: analysis for the Global Burden of Disease Study.  
421 *The Lancet*. **395**:200–11.
- 422 [2] Kwizera A, Baelani I, Mer M, Kissoon N, Schultz MJ, Patterson AJ et al. (2018) The long sepsis journey  
423 in low-and middle-income countries begins with a first step... but on which road?
- 424 [3] Bone RC, Balk RA, Cerra FB, Dellinger RP, Fein AM, Knaus WA et al. (1992) Definitions for sepsis and  
425 organ failure and guidelines for the use of innovative therapies in sepsis. *Chest*. **101**:1644–55.
- 426 [4] Levy MM, Fink MP, Marshall JC, Abraham E, Angus D, Cook D et al. (2003) 2001  
427 sccm/esicm/accp/ats/sis international sepsis definitions conference. *Intensive Care Medicine*. **29**:530–8.
- 428 [5] Singer M, Deutschman CS, Seymour CW, Shankar-Hari M, Annane D, Bauer M et al. (2016) The third  
429 international consensus definitions for sepsis and septic shock (Sepsis-3). *Jama*. **315**:801–10.
- 430 [6] van der Poll T, van de Veerdonk FL, Scicluna BP and Netea MG (2017) The immunopathology of sepsis  
431 and potential therapeutic targets. *Nature Reviews Immunology*. **17**:407.
- 432 [7] Venet F and Monneret G (2018) Advances in the understanding and treatment of sepsis-induced  
433 immunosuppression. *Nature Reviews Nephrology*. **14**:121.
- 434 [8] Ammer-Herrmenau C, Kulkarni U, Andreas N, Ungelenk M, Ravens S, Huebner C et al. (2019) Sepsis  
435 induces long-lasting impairments in CD4+ T-cell responses despite rapid numerical recovery of T-  
436 lymphocyte populations. *PloS One*. **14**.
- 437 [9] Mao Q, Jay M, Hoffman JL, Calvert J, Barton C, Shimabukuro D et al. (2018) Multicentre validation of a  
438 sepsis prediction algorithm using only vital sign data in the emergency department, general ward and ICU.  
439 *BMJ Open*. **8**:e017833.
- 440 [10] Taylor RA, Pare JR, Venkatesh AK, Mowafi H, Melnick ER, Fleischman W et al. (2016) Prediction of in-  
441 hospital mortality in emergency department patients with sepsis: a local big data–driven, machine learning  
442 approach. *Academic Emergency Medicine*. **23**:269–78.

- 443 [11] Nemati S, Holder A, Razmi F, Stanley MD, Clifford GD and Buchman TG (2018) An interpretable  
444 machine learning model for accurate prediction of sepsis in the ICU. *Critical Care Medicine*. **46**:547–53.
- 445 [12] Henry KE, Hager DN, Pronovost PJ and Saria S (2015) A targeted real-time early warning score  
446 (TREWScore) for septic shock. *Science Translational Medicine*. **7**:299ra122-299ra122.
- 447 [13] Smith GB, Prytherch DR, Meredith P, Schmidt PE and Featherstone PI (2013) The ability of the National  
448 Early Warning Score (NEWS) to discriminate patients at risk of early cardiac arrest, unanticipated  
449 intensive care unit admission, and death. *Resuscitation*. **84**:465–70.
- 450 [14] Rhodes A, Evans LE, Alhazzani W, Levy MM, Antonelli M, Ferrer R et al. (2017) Surviving sepsis  
451 campaign: international guidelines for management of sepsis and septic shock: 2016. *Intensive Care*  
452 *Medicine*. **43**:304–77.
- 453 [15] Klaerner H-G, Eschenbach U, Kamereck K, Lehn N, Wagner H and Miethke T (2000) Failure of an  
454 automated blood culture system to detect nonfermentative gram-negative bacteria. *Journal of Clinical*  
455 *Microbiology*. **38**:1036–41.
- 456 [16] Benjamin RJ and Wagner SJ (2007) The residual risk of sepsis: modeling the effect of concentration on  
457 bacterial detection in two-bottle culture systems and an estimation of false-negative culture rates.  
458 *Transfusion*. **47**:1381–9.
- 459 [17] Tay WH, Chong KKL and Kline KA (2016) Polymicrobial–host interactions during infection. *Journal of*  
460 *Molecular Biology*. **428**:3355–71.
- 461 [18] Westh H, Lisby G, Breyse F, Böddinghaus B, Chomarat M, Gant V et al. (2009) Multiplex real-time PCR  
462 and blood culture for identification of bloodstream pathogens in patients with suspected sepsis. *Clinical*  
463 *Microbiology and Infection*. **15**:544–51.
- 464 [19] Salter SJ, Cox MJ, Turek EM, Calus ST, Cookson WO, Moffatt MF et al. (2014) Reagent and laboratory  
465 contamination can critically impact sequence-based microbiome analyses. *BMC Biology*. **12**:87.
- 466 [20] Glassing A, Dowd SE, Galandiuk S, Davis B and Chiodini RJ (2016) Inherent bacterial DNA  
467 contamination of extraction and sequencing reagents may affect interpretation of microbiota in low  
468 bacterial biomass samples. *Gut Pathogens*. **8**:24.

- 469 [21] Weiss S, Amir A, Hyde ER, Metcalf JL, Song SJ and Knight R (2014) Tracking down the sources of  
470 experimental contamination in microbiome studies. *Genome Biology*. **15**:564.
- 471 [22] Blauwkamp TA, Thair S, Rosen MJ, Blair L, Lindner MS, Vilfan ID et al. (2019) Analytical and clinical  
472 validation of a microbial cell-free DNA sequencing test for infectious disease. *Nature Microbiology*.  
473 **4**:663–74.
- 474 [23] Grumaz S, Stevens P, Grumaz C, Decker SO, Weigand MA, Hofer S et al. (2016) Next-generation  
475 sequencing diagnostics of bacteremia in septic patients. *Genome Medicine*. **8**:73.
- 476 [24] Gosiewski T, Ludwig-Galezowska AH, Huminska K, Sroka-Oleksiak A, Radkowski P, Salamon D et al.  
477 (2017) Comprehensive detection and identification of bacterial DNA in the blood of patients with sepsis  
478 and healthy volunteers using next-generation sequencing method-the observation of DNAemia. *European*  
479 *Journal of Clinical Microbiology & Infectious Diseases*. **36**:329–36.
- 480 [25] Grumaz S, Grumaz C, Vainshtein Y, Stevens P, Glanz K, Decker SO et al. (2019) Enhanced performance  
481 of next-generation sequencing diagnostics compared with standard of care microbiological diagnostics in  
482 patients suffering from septic shock. *Critical Care Medicine*. **47**:e394.
- 483 [26] Lundberg SM, Erion G, Chen H, DeGrave A, Prutkin JM, Nair B et al. (2020) From local explanations to  
484 global understanding with explainable AI for trees. *Nature Machine Intelligence*. **2**:56–67.
- 485 [27] Chen T, Yu W-H, IZard J, Baranova O V, Lakshmanan A and Dewhirst FE (2010) The Human Oral  
486 Microbiome Database: a web accessible resource for investigating oral microbe taxonomic and genomic  
487 information. *Database*. **2010**.
- 488 [28] Pytko-Polonczyk J, Konturek SJ, Karczewska E, Bielański W and Kaczmarczyk-Stachowska A (1996)  
489 Oral cavity as permanent reservoir of *Helicobacter pylori* and potential source of reinfection. *Journal of*  
490 *Physiology and Pharmacology: An Official Journal of the Polish Physiological Society*. **47**:121–9.
- 491 [29] Periasamy S and Kolenbrander PE (2009) Mutualistic biofilm communities develop with *Porphyromonas*  
492 *gingivalis* and initial, early, and late colonizers of enamel. *Journal of Bacteriology*. **191**:6804–11.
- 493 [30] Cephas KD, Kim J, Mathai RA, Barry KA, Dowd SE, Meline BS et al. (2011) Comparative analysis of  
494 salivary bacterial microbiome diversity in edentulous infants and their mothers or primary care givers

- 495 using pyrosequencing. *PloS One*. **6**:e23503.
- 496 [31] Chen H and Jiang W (2014) Application of high-throughput sequencing in understanding human oral  
497 microbiome related with health and disease. *Frontiers in Microbiology*. **5**:508.
- 498 [32] Valm AM, Welch JLM, Rieken CW, Hasegawa Y, Sogin ML, Oldenbourg R et al. (2011) Systems-level  
499 analysis of microbial community organization through combinatorial labeling and spectral imaging.  
500 *Proceedings of the National Academy of Sciences*. **108**:4152–7.
- 501 [33] Saiman L, Chen Y, San Gabriel P and Knirsch C (2002) Synergistic activities of macrolide antibiotics  
502 against *Pseudomonas aeruginosa*, *Burkholderia cepacia*, *Stenotrophomonas maltophilia*, and *Alcaligenes*  
503 *xylosoxidans* isolated from patients with cystic fibrosis. *Antimicrobial Agents and Chemotherapy*.  
504 **46**:1105–7.
- 505 [34] Sánchez MU, Bello HT, Domínguez MY, Mella SM, Zemelman RZ and González GR (2006)  
506 Transference of extended-spectrum beta-lactamases from nosocomial strains of *Klebsiella pneumoniae* to  
507 other species of *Enterobacteriaceae*. *Revista Medica de Chile*. **134**:415–20.
- 508 [35] Tan X, Liu H, Long J, Jiang Z, Luo Y, Zhao X et al. (2019) Septic patients in the intensive care unit  
509 present different nasal microbiotas. *Future Microbiology*. **14**:383–95.
- 510 [36] Haak BW, Prescott HC and Wiersinga WJ (2018) Therapeutic potential of the gut microbiota in the  
511 prevention and treatment of sepsis. *Frontiers in Immunology*. **9**:2042.
- 512 [37] Bharucha T, Oeser C, Balloux F, Brown JR, Carbo EC, Charlett A et al. (2020) STROBE-metagenomics: a  
513 STROBE extension statement to guide the reporting of metagenomics studies. *The Lancet Infectious*  
514 *Diseases*.
- 515 [38] Casadevall A and Pirofski L (2000) Host-pathogen interactions: basic concepts of microbial  
516 commensalism, colonization, infection, and disease. *Infection and Immunity*. **68**:6511–8.
- 517 [39] Balloux F and van Dorp L (2017) Q&A: What are pathogens, and what have they done to and for us?  
518 *BMC Biology*. **15**:1–6.
- 519 [40] Jervis-Bardy J, Leong LEX, Marri S, Smith RJ, Choo JM, Smith-Vaughan HC et al. (2015) Deriving  
520 accurate microbiota profiles from human samples with low bacterial content through post-sequencing

- 521 processing of Illumina MiSeq data. *Microbiome*. **3**:19.
- 522 [41] Davis NM, Proctor DM, Holmes SP, Relman DA and Callahan BJ (2018) Simple statistical identification  
523 and removal of contaminant sequences in marker-gene and metagenomics data. *Microbiome*. **6**:226.
- 524 [42] Grumaz C, Hoffmann A, Vainshtein Y, Kopp M, Grumaz S, Stevens P et al. (2020) Rapid Next-  
525 Generation Sequencing–Based Diagnostics of Bacteremia in Septic Patients. *The Journal of Molecular*  
526 *Diagnostics*. **22**:405–18.
- 527 [43] Sanderson ND, Street TL, Foster D, Swann J, Atkins BL, Brent AJ et al. (2018) Real-time analysis of  
528 nanopore-based metagenomic sequencing from infected orthopaedic devices. *BMC Genomics*. **19**:714.
- 529 [44] Salipante SJ, Sengupta DJ, Rosenthal C, Costa G, Spangler J, Sims EH et al. (2013) Rapid 16S rRNA  
530 next-generation sequencing of polymicrobial clinical samples for diagnosis of complex bacterial  
531 infections. *PloS One*. **8**:e65226–e65226.
- 532 [45] Brenner T, Decker SO, Grumaz S, Stevens P, Bruckner T, Schmoch T et al. (2018) Next-generation  
533 sequencing diagnostics of bacteremia in sepsis (Next GeneSiS-Trial): study protocol of a prospective,  
534 observational, noninterventional, multicenter, clinical trial. *Medicine*. **97**.
- 535 [46] Morfopoulou S and Plagnol V (2015) Bayesian mixture analysis for metagenomic community profiling.  
536 *Bioinformatics*. **31**:2930–8.
- 537 [47] McIntyre ABR, Ounit R, Afshinnekoo E, Prill RJ, Hénaff E, Alexander N et al. (2017) Comprehensive  
538 benchmarking and ensemble approaches for metagenomic classifiers. *Genome Biology*. **18**:182.
- 539 [48] Simon HY, Siddle KJ, Park DJ and Sabeti PC (2019) Benchmarking metagenomics tools for taxonomic  
540 classification. *Cell*. **178**:779–94.
- 541 [49] Bolger AM, Lohse M and Usadel B (2014) Trimmomatic: a flexible trimmer for Illumina sequence data.  
542 *Bioinformatics*. **30**:2114–20.
- 543 [50] Langmead B, Trapnell C, Pop M and Salzberg SL (2009) Ultrafast and memory-efficient alignment of  
544 short DNA sequences to the human genome. *Genome Biology*. **10**:R25.
- 545 [51] Bushnell B (2014) BBMap: a fast, accurate, splice-aware aligner.
- 546 [52] Martin M (2011) Cutadapt removes adapter sequences from high-throughput sequencing reads. *EMBnet*

- 547 Journal. **17**:10–2.
- 548 [53] Aronesty E (2013) Comparison of sequencing utility programs. *The Open Bioinformatics Journal*. **7**.
- 549 [54] Wood DE, Lu J and Langmead B (2019) Improved metagenomic analysis with Kraken 2. *Genome*  
550 *Biology*. **20**:257.
- 551 [55] Lu J and Salzberg S (2020) Ultrafast and accurate 16S microbial community analysis using Kraken 2.  
552 *BioRxiv*.
- 553 [56] Chen T and Guestrin C (2016) Xgboost: A scalable tree boosting system. *Proceedings of the 22nd Acm*  
554 *Sigkdd International Conference on Knowledge Discovery and Data Mining*. p. 785–94.
- 555 [57] Bergstra J and Bengio Y (2012) Random search for hyper-parameter optimization. *The Journal of Machine*  
556 *Learning Research*. **13**:281–305.
- 557 [58] Pedregosa F, Varoquaux G, Gramfort A, Michel V, Thirion B, Grisel O et al. (2011) Scikit-learn: Machine  
558 learning in Python. *The Journal of Machine Learning Research*. **12**:2825–30.
- 559 [59] Saito T and Rehmsmeier M (2015) The precision-recall plot is more informative than the ROC plot when  
560 evaluating binary classifiers on imbalanced datasets. *PloS One*. **10**:e0118432.
- 561 [60] Shaw LP, Wang AD, Dylus D, Meier M, Pogacnik G, Dessimoz C et al. (2020) The phylogenetic range of  
562 bacterial and viral pathogens of vertebrates. *Molecular Ecology*. **n/a**.
- 563 [61] Virtanen P, Gommers R, Oliphant TE, Haberland M, Reddy T, Cournapeau D et al. (2020) SciPy 1.0:  
564 fundamental algorithms for scientific computing in Python. *Nature Methods*. **17**:261–72.
- 565 [62] Friedman J and Alm EJ (2012) Inferring correlation networks from genomic survey data. *PLoS Comput*  
566 *Biol*. **8**:e1002687.
- 567 [63] Kurtz ZD, Müller CL, Miraldi ER, Littman DR, Blaser MJ and Bonneau RA (2015) Sparse and  
568 compositionally robust inference of microbial ecological networks. *PLoS Comput Biol*. **11**:e1004226.
- 569 [64] Csardi G and Nepusz T (2006) The igraph software package for complex network research. *InterJournal,*  
570 *Complex Systems*. **1695**:1–9.

571
